# Supplementary material for: Charging of ionic liquid surfaces under X-ray irradiation: the measurement of absolute binding energies by XPS
Source: Royal Society of Chemistry journal article supplement (doi:10.1039/c0cp01587c), 2010-12-13
Supplement: c0cp01587c.pdf [file c0cp01587c.pdf]

**Charging of Ionic Liquid Surfaces Under X-ray Irradiation:  
The Measurement of Absolute Binding Energies by XPS.**

Supplementary information

*Ignacio J. Villar-Garcia, Emily F. Smith, Alasdair W. Taylor, Fulian Qiu,  
Kevin R. J. Lovelock, Robert G. Jones and Peter Licence\**

*School of Chemistry, The University of Nottingham, Nottingham NG7 2RD, UK*

*\*To whom correspondence should be addressed:*

[\*peter.licence@nottingham.ac.uk\*](mailto:peter.licence@nottingham.ac.uk)

*Tel: +44 115 8466176*

**Figure S1.** Wide and fitted high resolution scans of all [C<sub>8</sub>C<sub>1</sub>Im][X] studied. C 1s high resolution scans were fitted using the model described in the paper (Figure 8). All modelled components in F 1s, O 1s, N 1s and B 1s high resolution scans were fitted assuming equal FWHM. P 2p and S 2p high resolution scans were fitted taking into account spin orbit coupling splittings of 0.84 eV for P 2p, 1.18 eV for S 2p, 1.60 eV for Cl 2p and 1.05 eV for Br 3d.<sup>1</sup> The p<sub>1/2</sub>:p<sub>3/2</sub> ratio was set to 1:2, the d<sub>3/2</sub>:d<sub>5/2</sub> ratio was set to 2:3, the FWHM in both cases was set to 1:1 for each contribution.<sup>2</sup> For N 1s high resolution scans, the N<sub>cation</sub> signal is affected by the shake up/off phenomena and was fitted with a 12% intensity loss with respect to other peaks.<sup>3</sup>

### S1.1 [C<sub>8</sub>C<sub>1</sub>Im]Cl wide and high resolution scans.

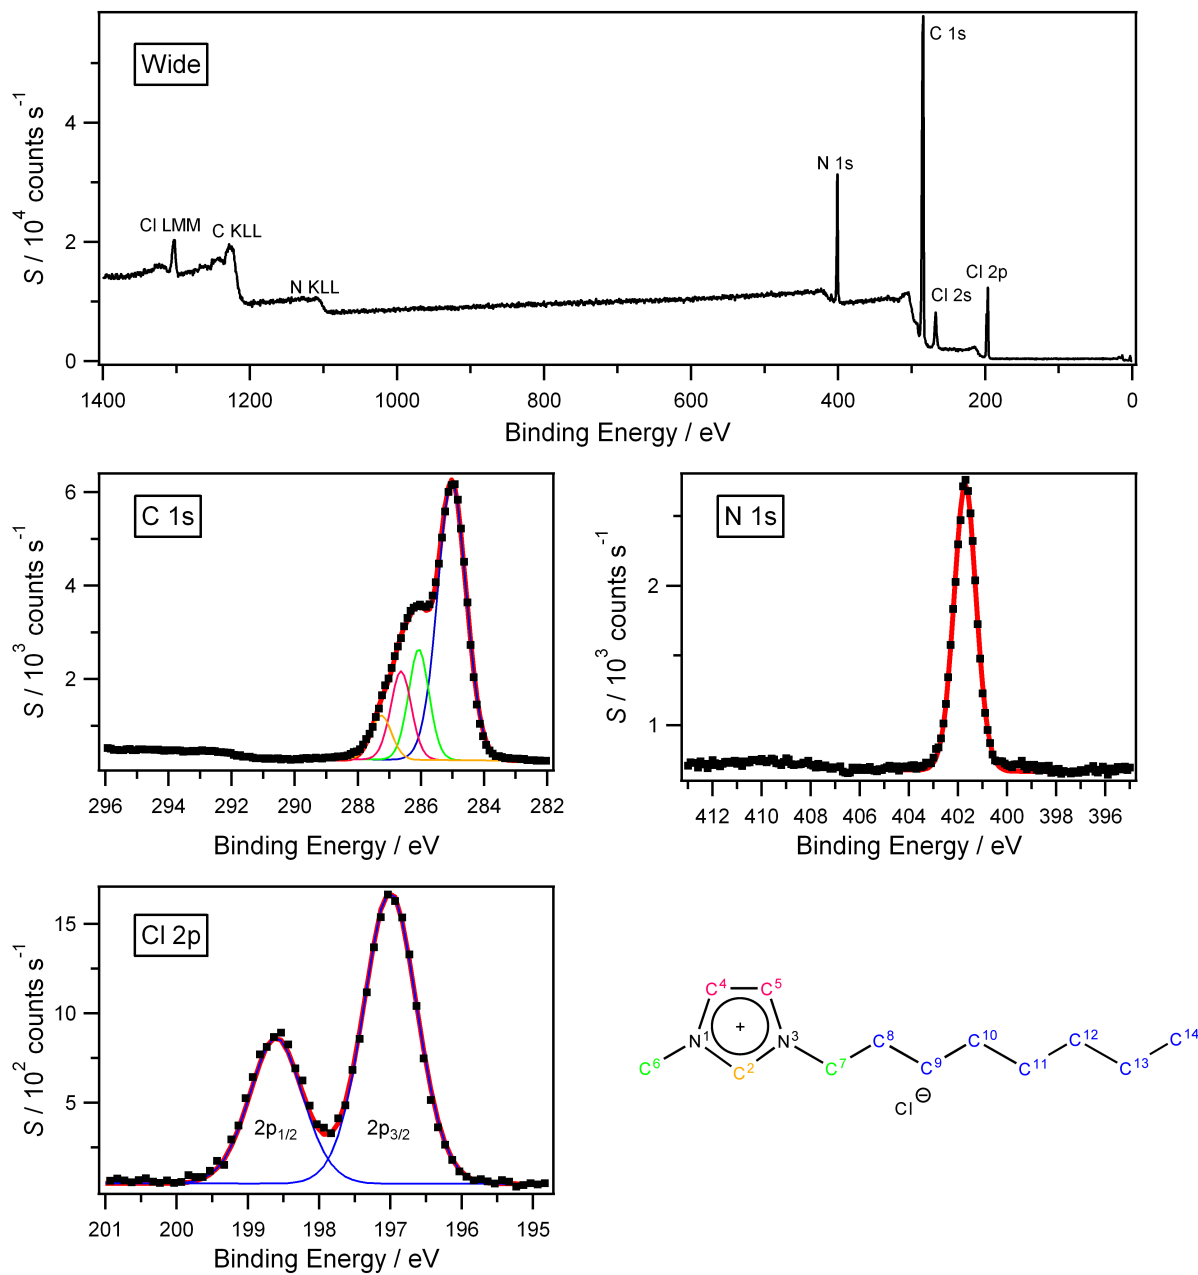

### S1.2 [C<sub>8</sub>C<sub>1</sub>Im]Br wide and high resolution scans.

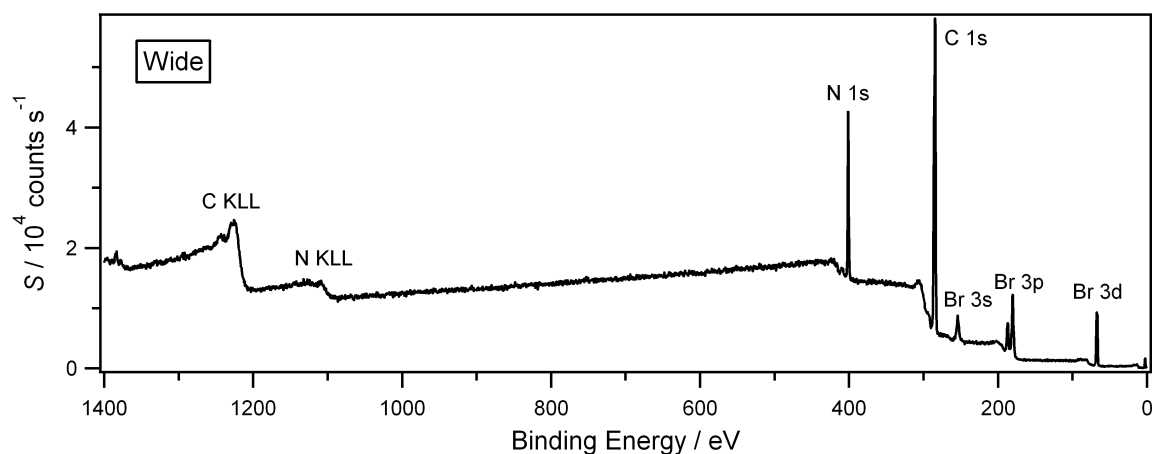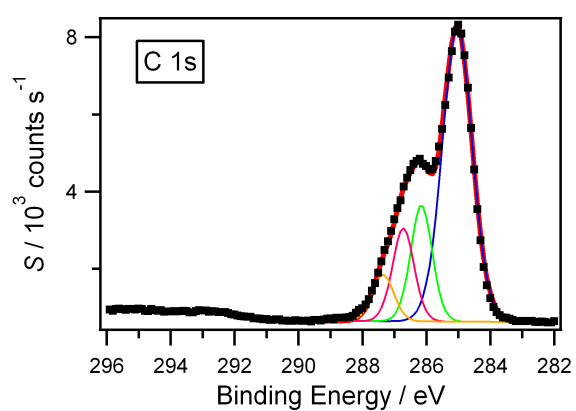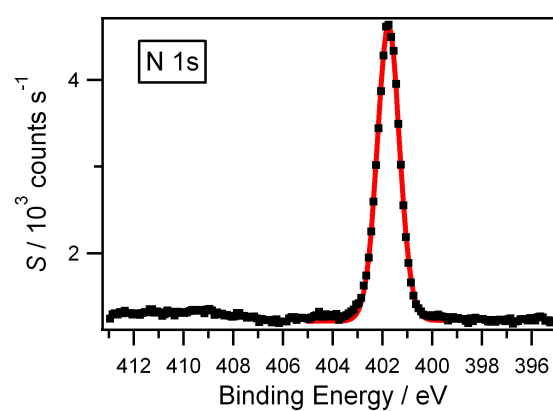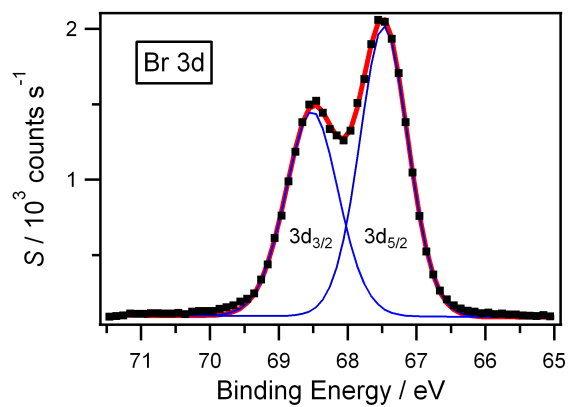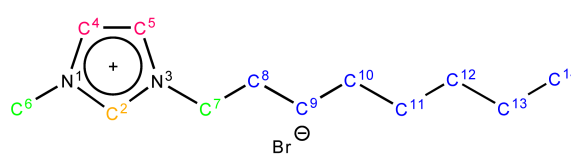

### S1.3 [C<sub>8</sub>C<sub>1</sub>Im]<sup>+</sup>I<sup>-</sup> wide and high resolution scans.

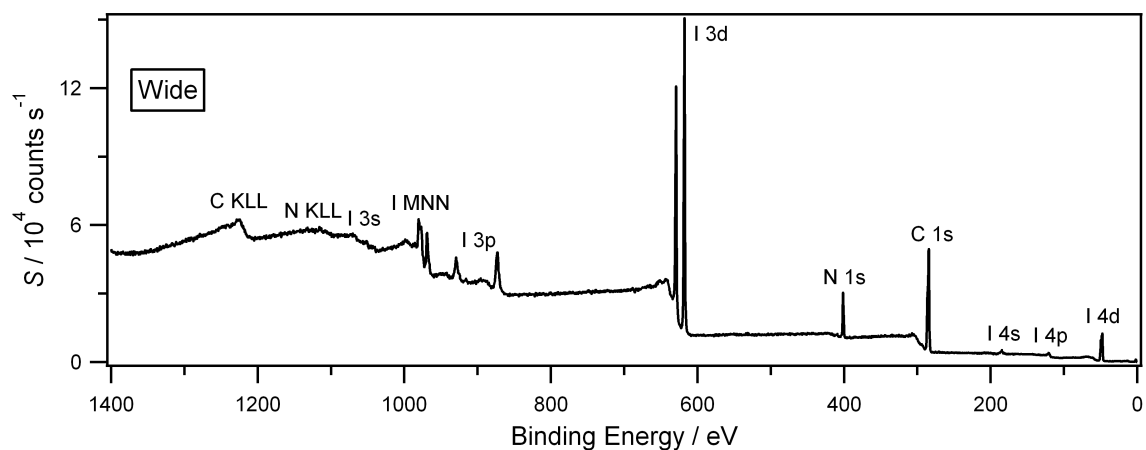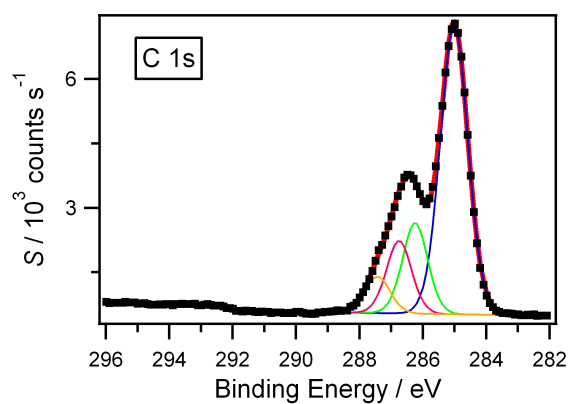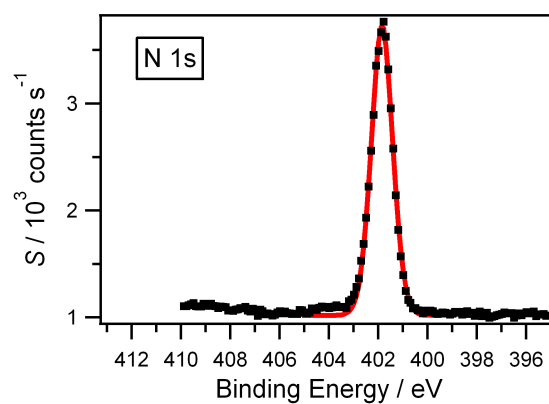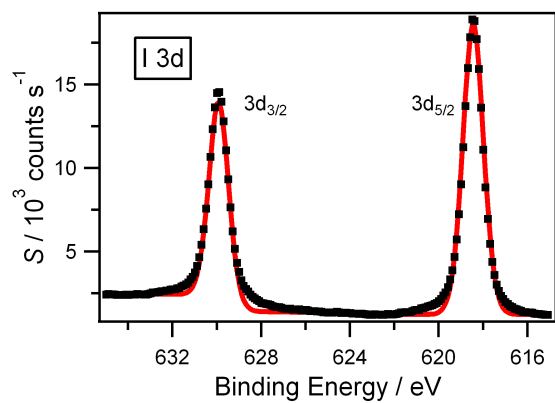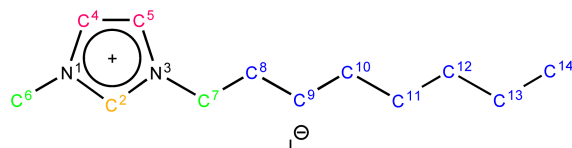

### S1.4 [C<sub>8</sub>C<sub>1</sub>Im][N(CN)<sub>2</sub>] wide and high resolution scans.

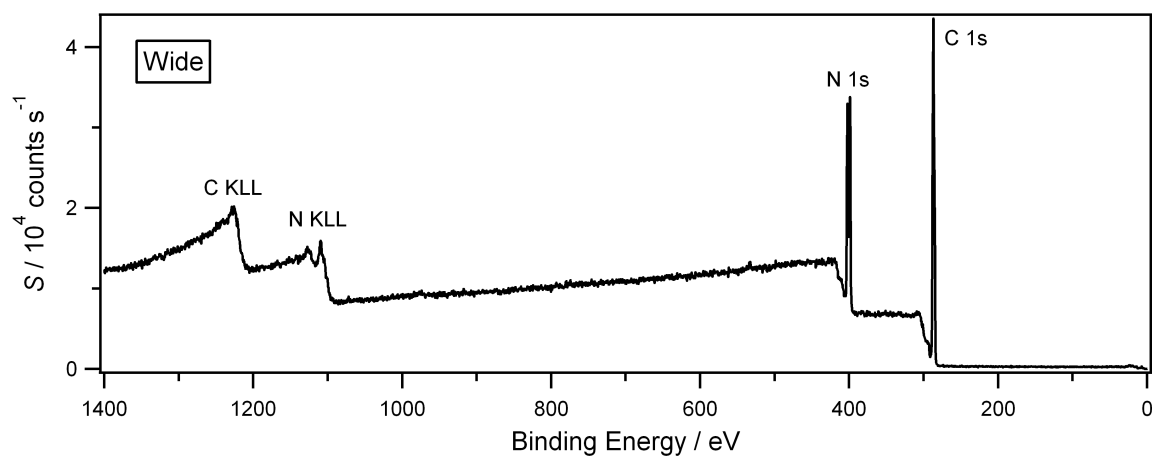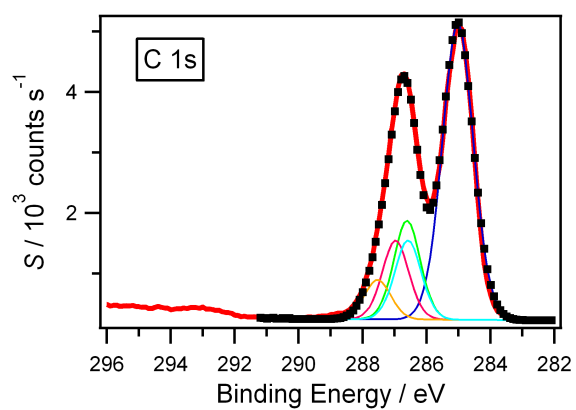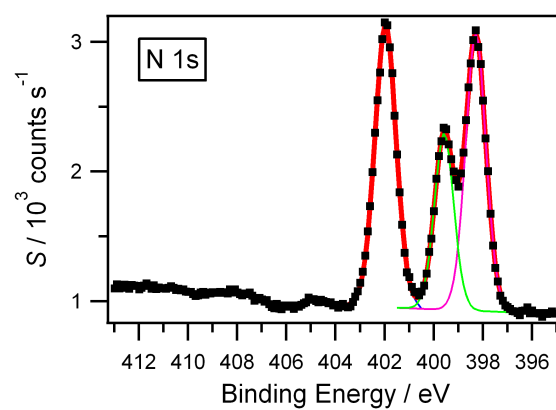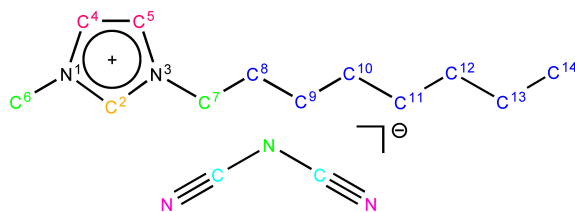

### S1.5 [C<sub>8</sub>C<sub>1</sub>Im][BF<sub>4</sub>] wide and high resolution scans.

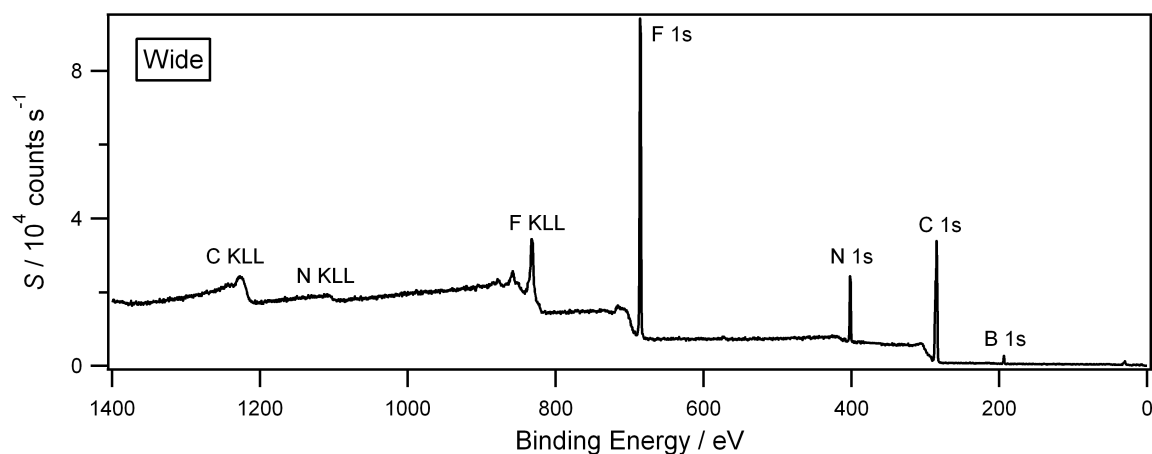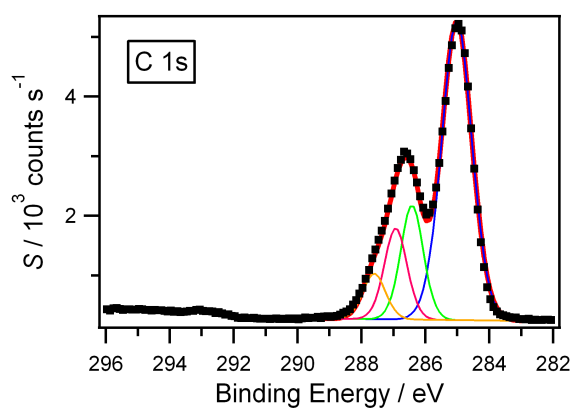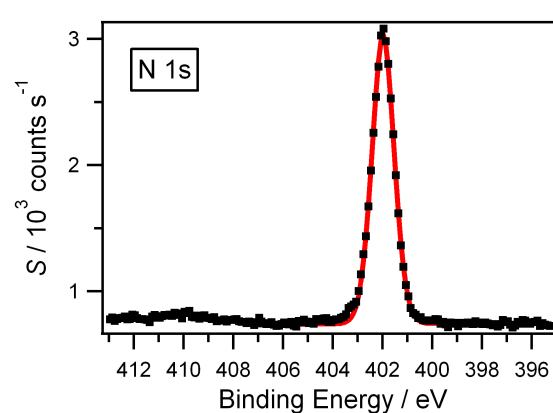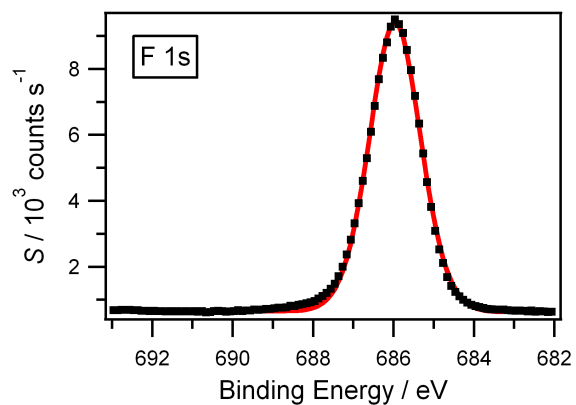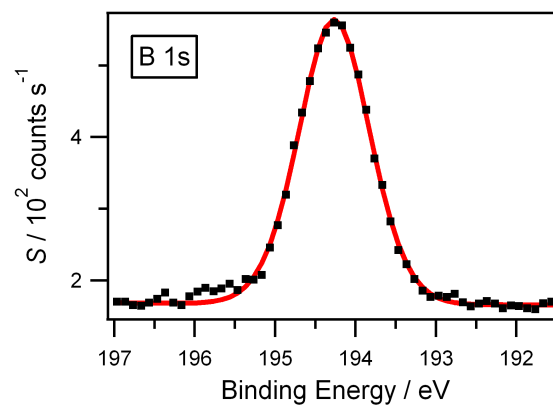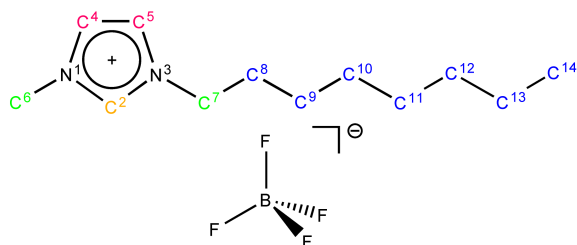

### S1.6 [C<sub>8</sub>C<sub>1</sub>Im][PF<sub>6</sub>] wide and high resolution scans.

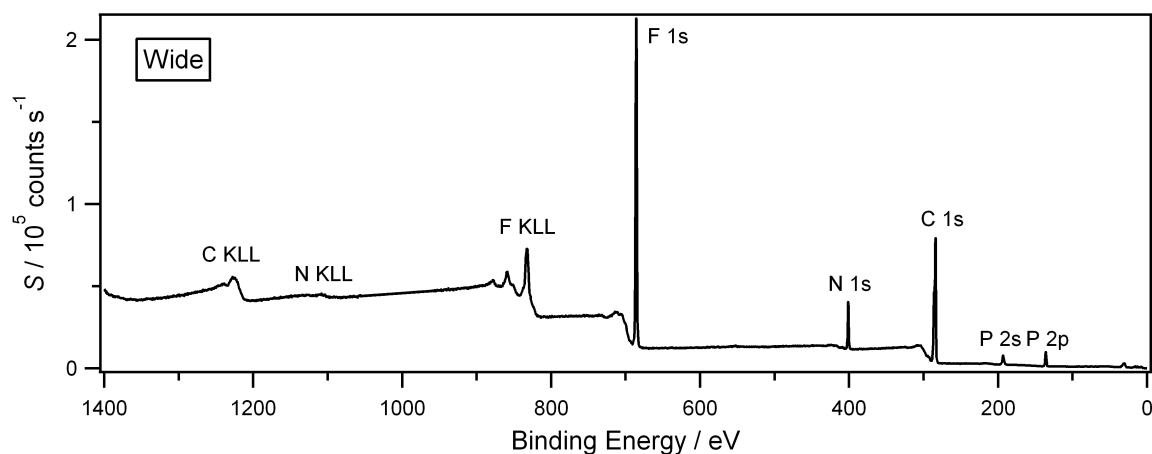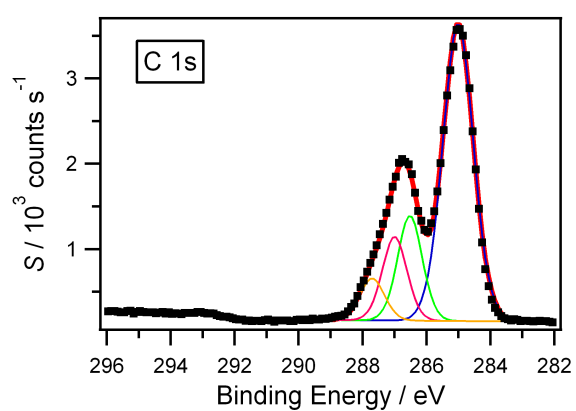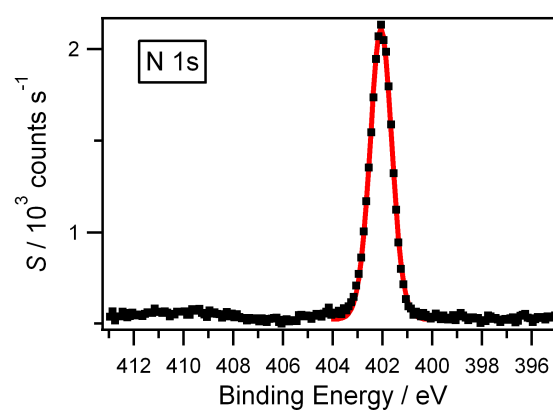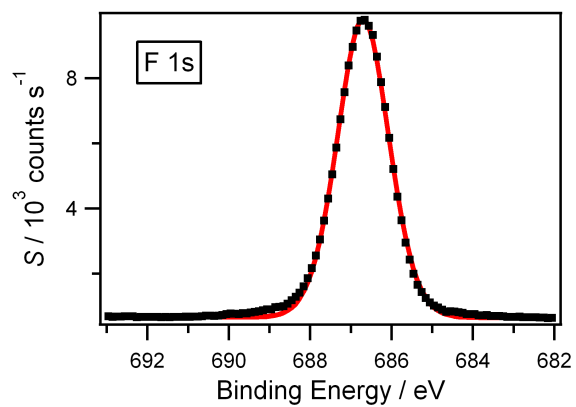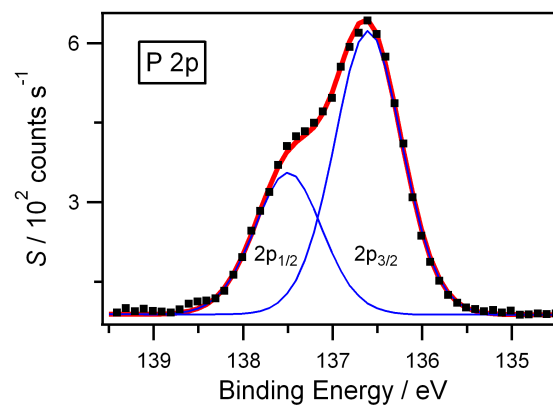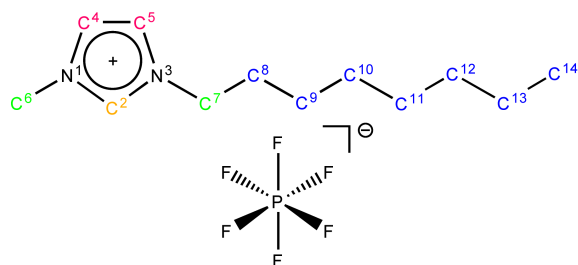



### S1.7 [C<sub>8</sub>C<sub>1</sub>Im][TfO] wide and high resolution scans.

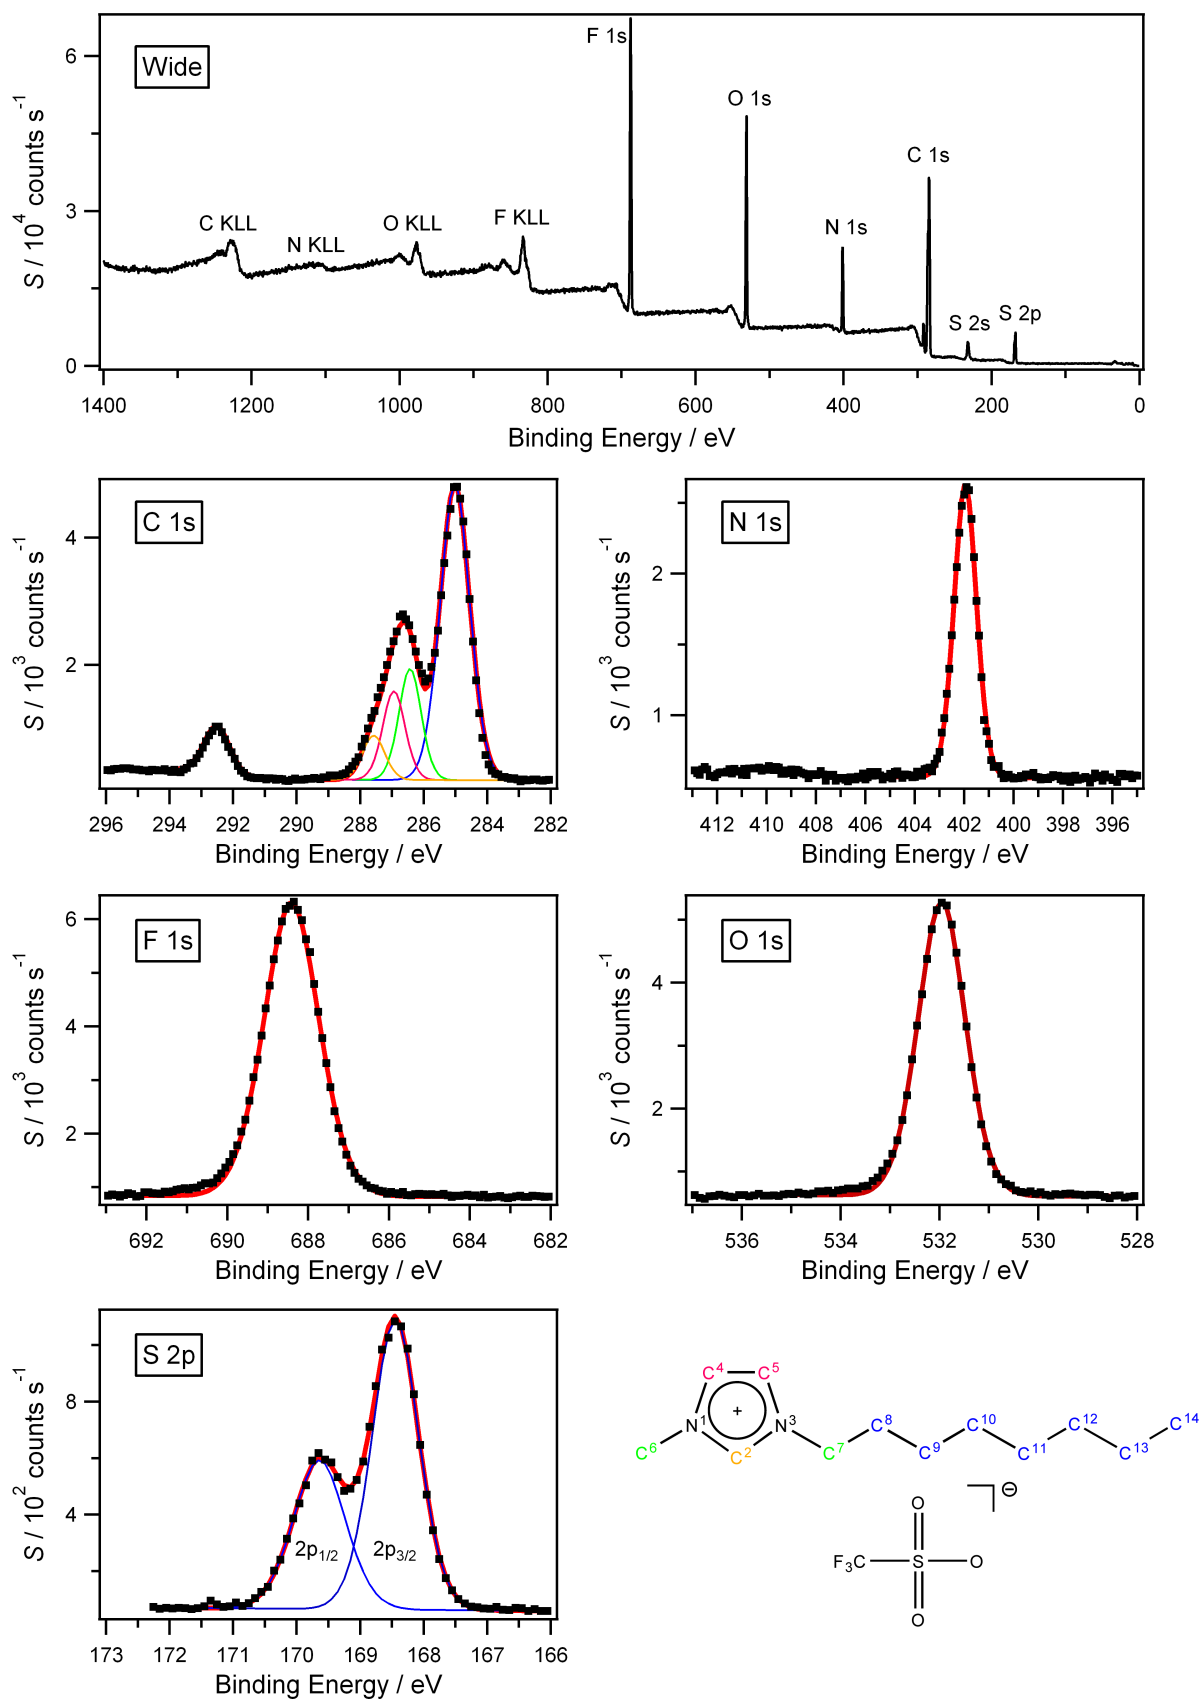

### S1.8 [C<sub>8</sub>C<sub>1</sub>Im][Tf<sub>2</sub>N] wide and high resolution scans.

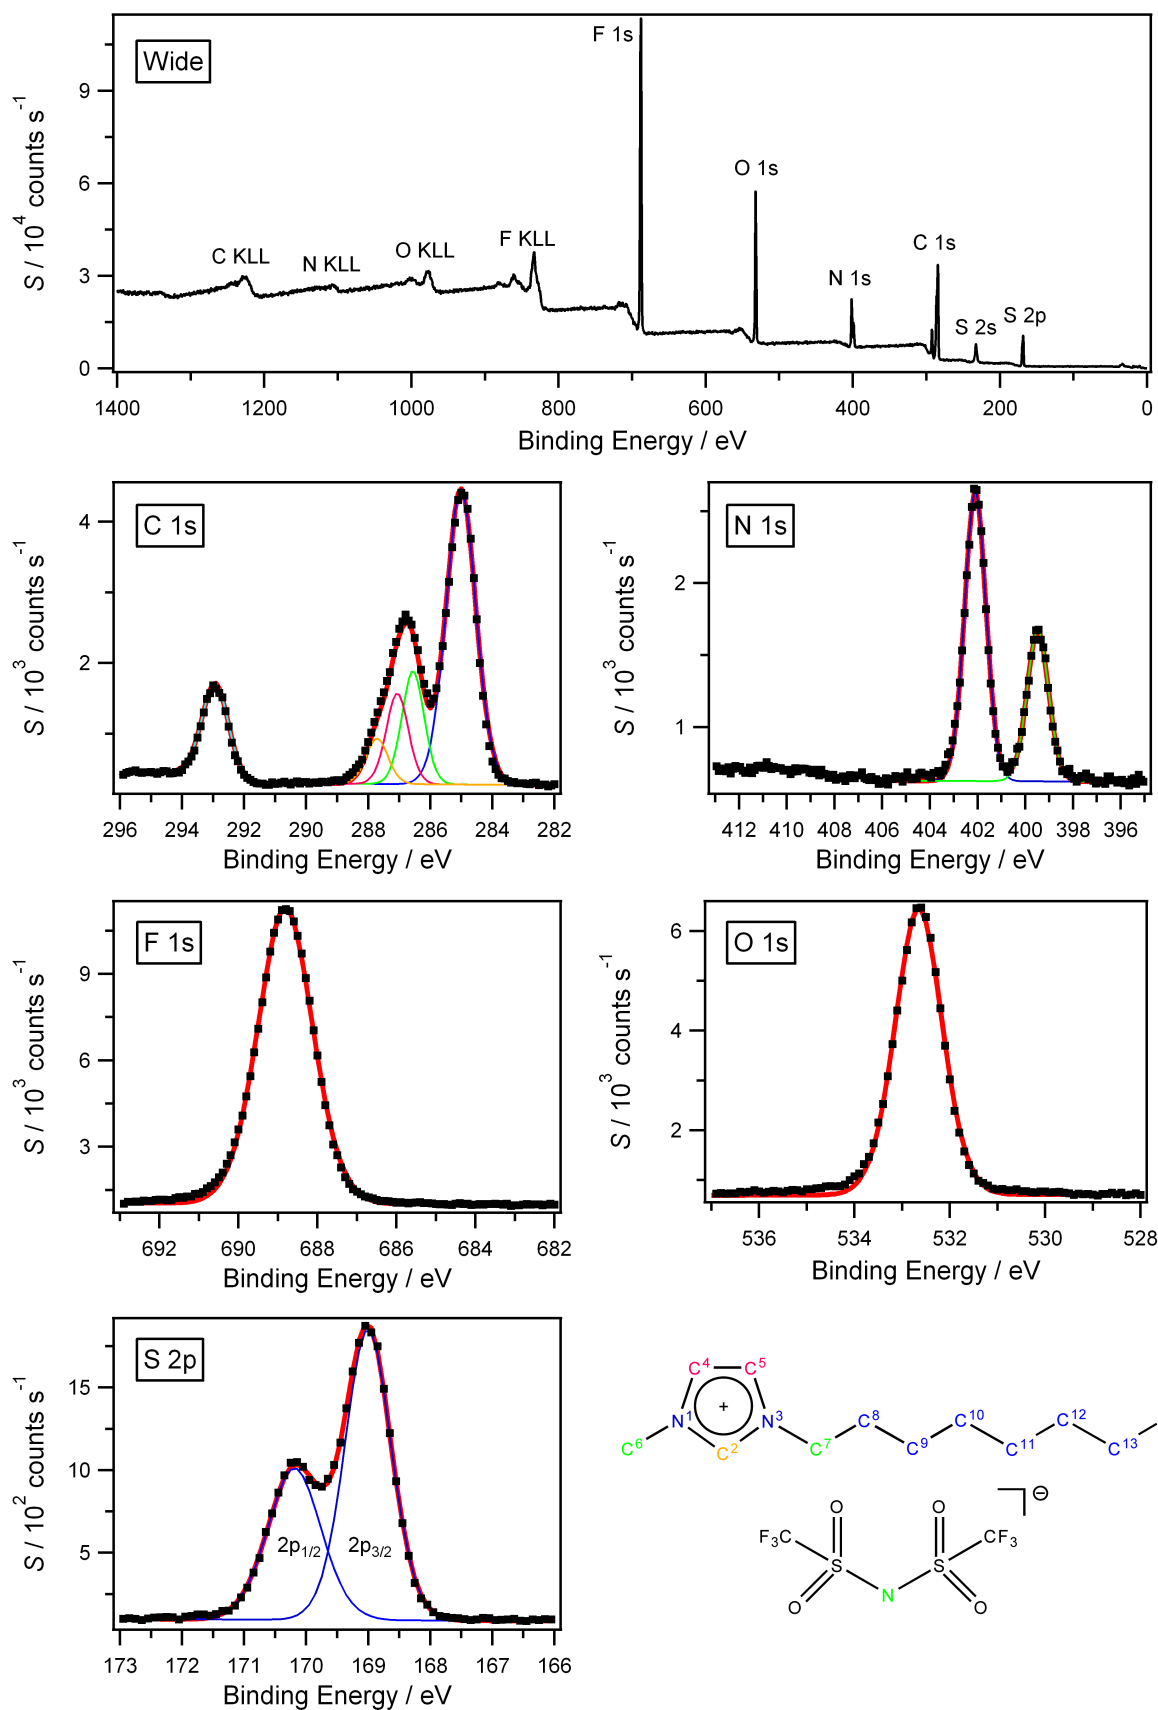

## **References**

1. J. F. Moulder, W. F. Stickle, P. E. Sobol, K. D. Bomben, *Handbook of X-ray photoelectron spectroscopy: a reference book of standard spectra for identification and interpretation of XPS data*; Physical Electronics: Eden Prairie, MN. 1995.
2. H. W. Nesbitt, G. M. Bancroft, R. Davidson, N. S. McIntyre, A. R. Pratt, *Am. Miner.* **2004**, *89*, 878-882.
3. I. J. Villar-Garcia, PhD Thesis, University of Nottingham, 2009.
